# Supplementary material for: Attentional Bias Modification in Virtual Reality – A VR-Based Dot-Probe Task With 2D and 3D Stimuli
Source: PubMed Central journal article supplement (PMC6863810; doi:10.3389/fpsyg.2019.02526), 2019-11-13
Supplement: Image_1.pdf [file Image_1.pdf]

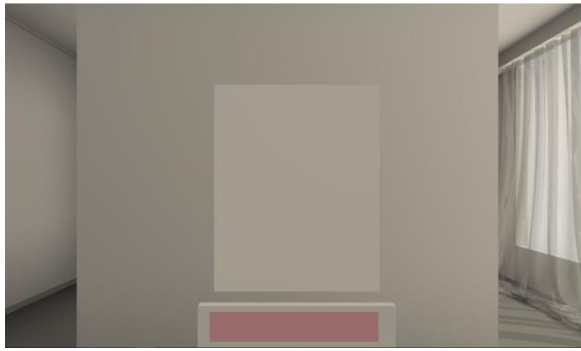

(a) VR environment

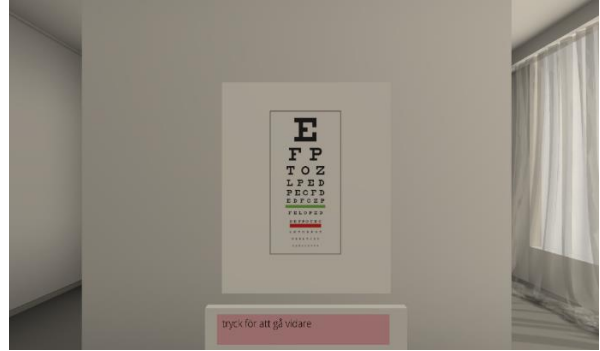

(b) Snellen chart for visual acuity check

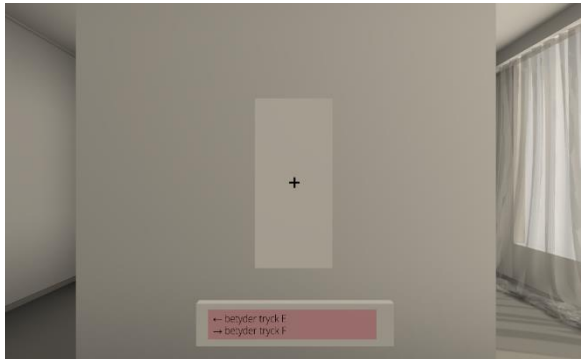

(c) Fixation cross

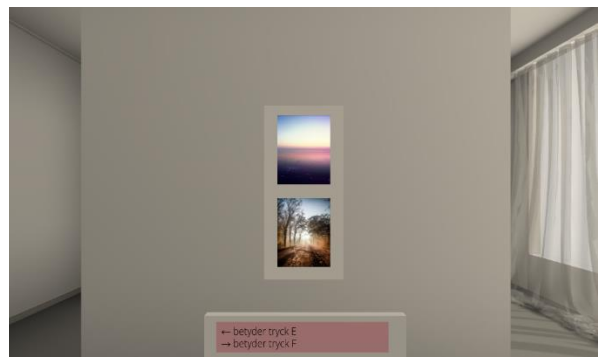

(d) Stimuli presentation

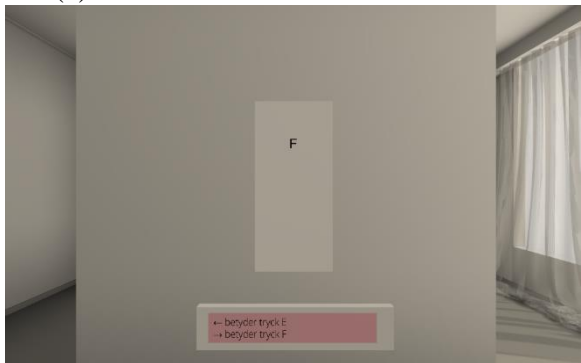

(e) Probe presentation

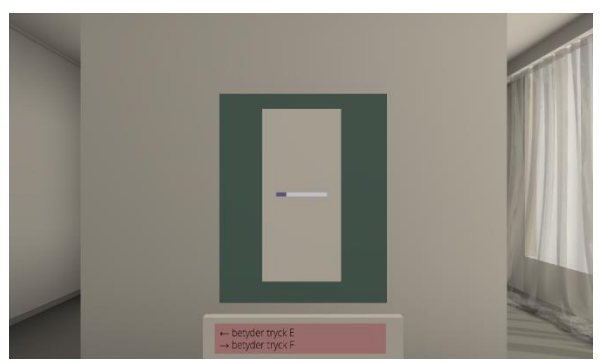

(f) Response feedback (tutorial only)

*Figure S1.* Screenshots of the virtual environment.
